# Supplementary material
Source: MDPI journal article supplement (https://www.mdpi.com/2077-0472/14/2/266)
Supplement: s1 [file s1]

## Supplementary material

**Table S1. Weekly meteorological data from May 2021 to April 2022 of the experimental farms from where the seeds were collected.**

| <b>Week</b> | <b>T.max</b> | <b>T.min</b> | <b>RH</b> | <b>Rainfall</b> |
|-------------|--------------|--------------|-----------|-----------------|
| 18          | 38.49        | 24.13        | 48.86     | 0.00            |
| 19          | 41.19        | 26.41        | 50.86     | 0.00            |
| 20          | 43.21        | 26.54        | 50.29     | 0.17            |
| 21          | 35.54        | 22.14        | 63.29     | 7.54            |
| 22          | 41.59        | 24.40        | 49.71     | 0.86            |
| 23          | 43.97        | 26.79        | 37.14     | 0.00            |
| 24          | 39.86        | 26.53        | 59.71     | 3.26            |
| 25          | 36.29        | 24.51        | 54.29     | 0.00            |
| 26          | 36.66        | 27.20        | 69.43     | 20.94           |
| 27          | 37.50        | 28.44        | 70.29     | 0.00            |
| 28          | 36.04        | 26.03        | 73.57     | 11.17           |
| 29          | 34.77        | 25.49        | 79.71     | 12.80           |
| 30          | 33.07        | 24.89        | 79.43     | 11.00           |
| 31          | 33.23        | 25.51        | 79.71     | 1.29            |
| 32          | 34.16        | 26.21        | 72.71     | 0.00            |
| 33          | 33.87        | 25.21        | 71.86     | 4.51            |
| 34          | 35.03        | 25.67        | 74.86     | 2.44            |
| 35          | 35.49        | 25.39        | 71.57     | 3.09            |
| 36          | 36.87        | 25.43        | 72.14     | 0.00            |
| 37          | 32.30        | 23.46        | 82.14     | 6.56            |
| 38          | 31.59        | 22.89        | 84.14     | 20.79           |
| 39          | 35.29        | 23.16        | 70.43     | 0.00            |
| 40          | 31.57        | 23.26        | 84.71     | 16.03           |
| 41          | 28.76        | 21.03        | 78.00     | 3.24            |
| 42          | 32.77        | 18.77        | 64.14     | 0.00            |
| 43          | 30.84        | 16.43        | 64.57     | 0.00            |
| 44          | 31.20        | 17.06        | 68.57     | 0.00            |
| 45          | 28.97        | 18.10        | 68.43     | 0.00            |
| 46          | 26.77        | 15.04        | 63.86     | 0.00            |
| 47          | 26.64        | 9.79         | 60.71     | 0.00            |
| 48          | 25.36        | 8.36         | 64.14     | 0.00            |
| 49          | 24.36        | 8.16         | 62.00     | 0.00            |

|    |       |       |       |      |
|----|-------|-------|-------|------|
| 50 | 24.91 | 6.84  | 64.29 | 0.00 |
| 51 | 20.66 | 5.01  | 73.29 | 0.00 |
| 52 | 18.57 | 5.94  | 74.14 | 0.00 |
| 1  | 16.20 | 3.66  | 81.00 | 0.00 |
| 2  | 17.69 | 4.90  | 75.57 | 0.00 |
| 3  | 19.40 | 4.14  | 63.71 | 0.00 |
| 4  | 21.04 | 8.69  | 76.57 | 0.00 |
| 5  | 20.96 | 8.50  | 69.86 | 4.77 |
| 6  | 26.76 | 11.80 | 63.71 | 0.00 |
| 7  | 26.66 | 9.57  | 66.29 | 0.00 |
| 8  | 30.79 | 11.80 | 68.29 | 0.00 |
| 9  | 30.23 | 14.11 | 62.14 | 0.00 |
| 10 | 30.30 | 13.87 | 59.86 | 0.00 |
| 11 | 31.20 | 14.77 | 62.00 | 0.61 |
| 12 | 27.46 | 15.56 | 70.86 | 7.43 |
| 13 | 29.54 | 15.34 | 66.71 | 6.96 |
| 14 | 32.46 | 17.16 | 54.64 | 0.49 |
| 15 | 37.49 | 18.40 | 46.36 | 0.00 |
| 16 | 38.20 | 21.93 | 50.79 | 0.74 |
| 17 | 34.69 | 19.53 | 54.64 | 0.13 |

T.Max- maximum daily temperature; T.Min- minimum daily temperature; RH- relative humidity
